# Supplementary material for: Drivers of nitrogen and phosphorus dynamics in a groundwater-fed urban catchment revealed by high frequency monitoring
Source: Copernicus journal article supplement (doi:10.5194/hess-2020-34), 2020-02-26
Supplement: Supplementary file [file hess-2020-34-AC1-supplement.zip]

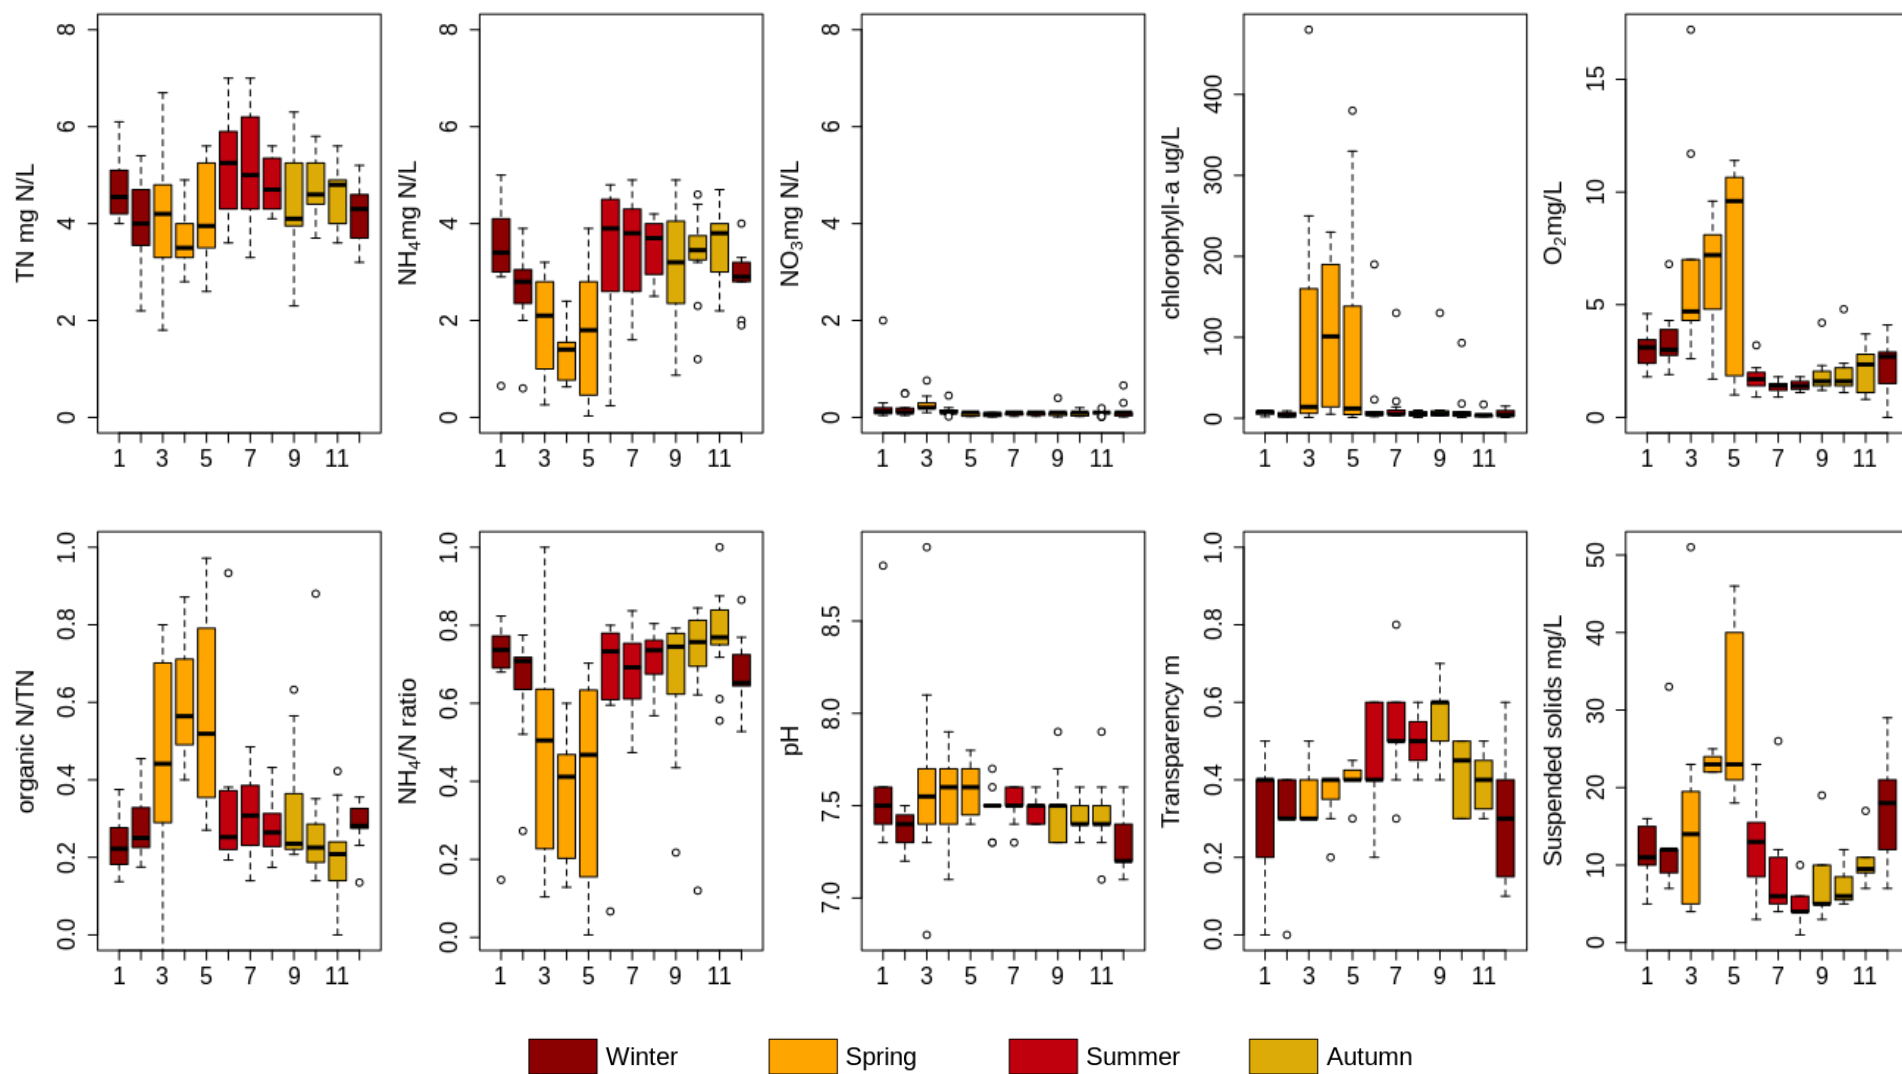

Figure 6 Monthly measurement of TN, NH<sub>4</sub>-N, NO<sub>3</sub>- N, chlorophyll-a, O<sub>2</sub> organic N/ TN and NH<sub>4</sub>-N /TN (NH<sub>4</sub>/N) mass ratio, *pH* , water transparency, and suspended solids in Geuzenveld from 2007 to 2018. X axis is month.
