# Supplementary material for: Drivers of nitrogen and phosphorus dynamics in a groundwater-fed urban catchment revealed by high frequency monitoring
Source: Copernicus journal article supplement (doi:10.5194/hess-2020-34), 2020-02-26
Supplement: Supplementary file [file hess-2020-34-AC1-supplement.zip]

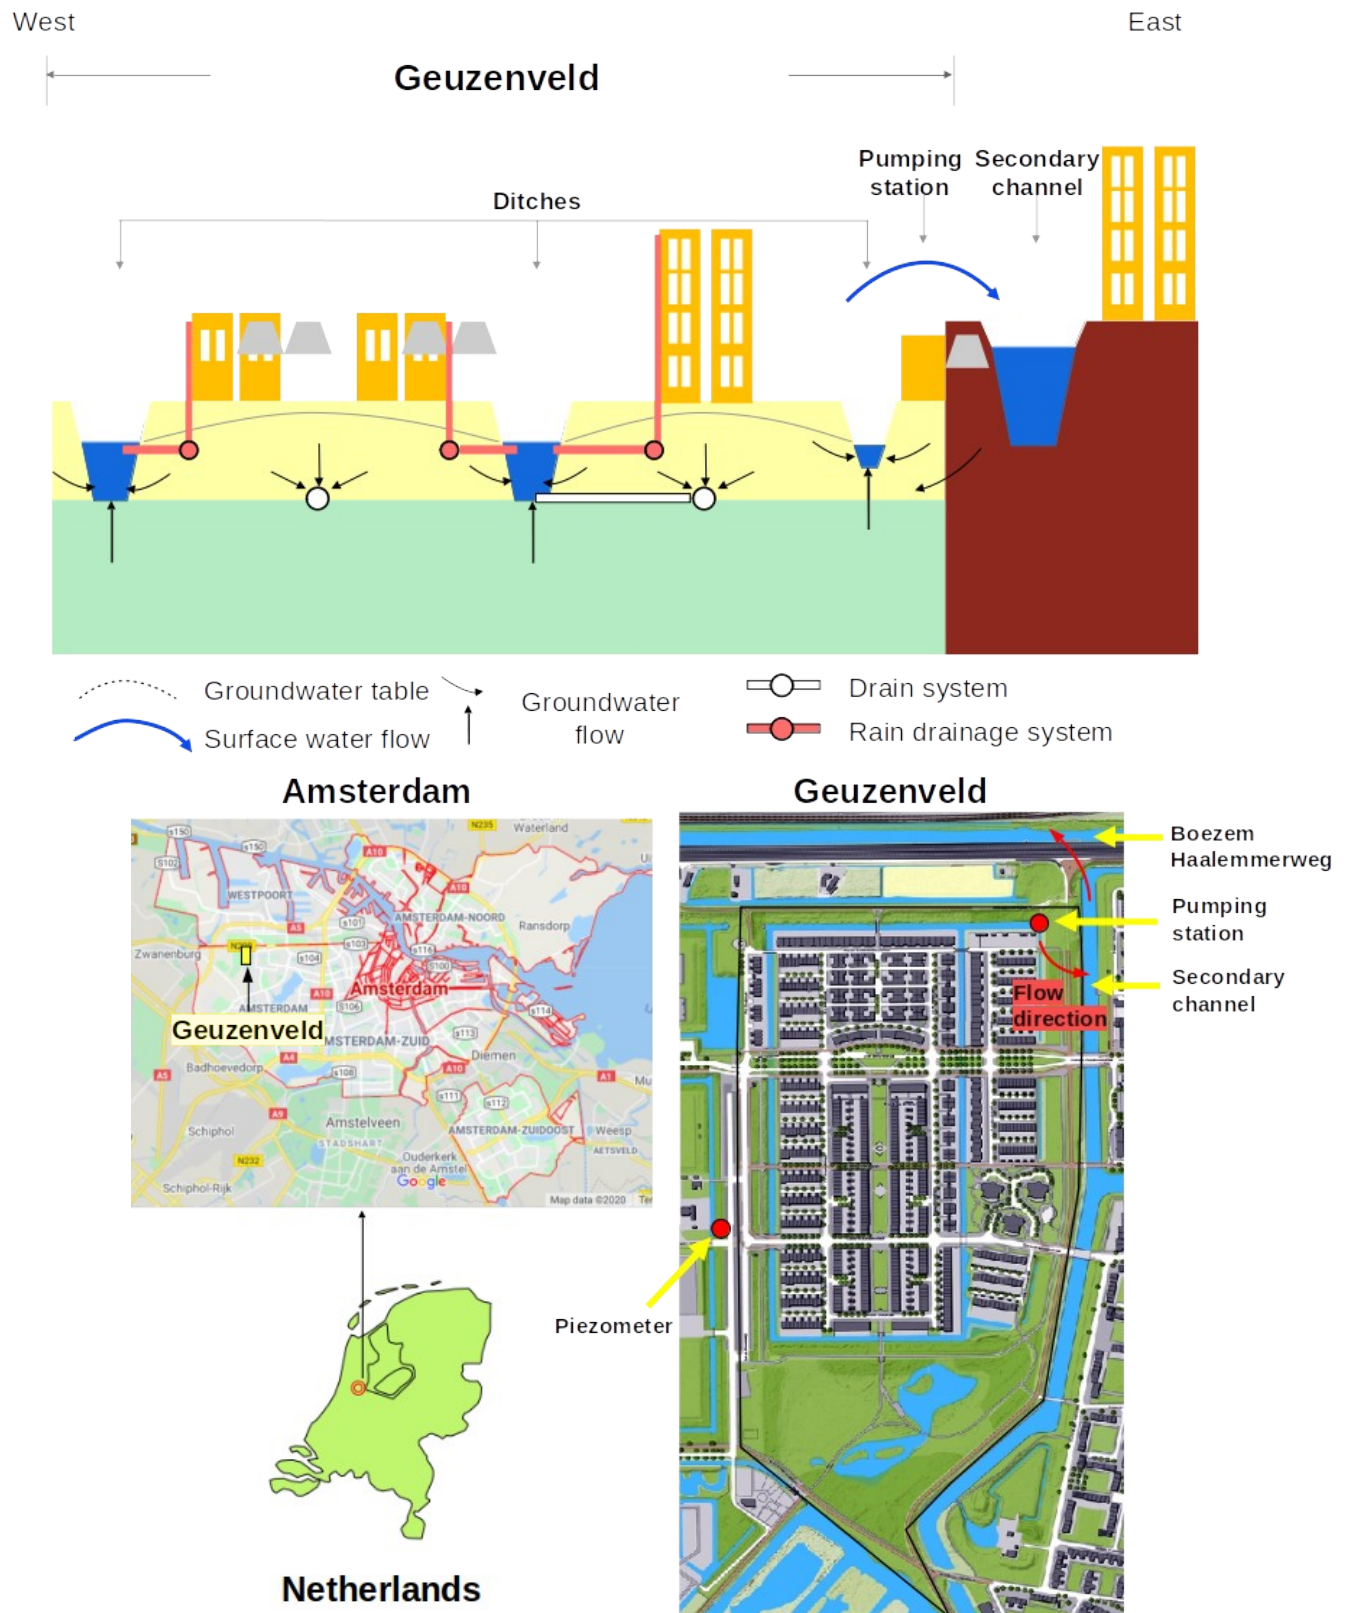

Figure 1 Location of polder Geuzenveld (source: © Google Maps ) and its landscape cross section and rain water and groundwater drainage system.
