# Supplementary material for: Drivers of nitrogen and phosphorus dynamics in a groundwater-fed urban catchment revealed by high frequency monitoring
Source: Copernicus journal article supplement (doi:10.5194/hess-2020-34), 2020-02-26
Supplement: Supplementary file [file hess-2020-34-AC1-supplement.zip]

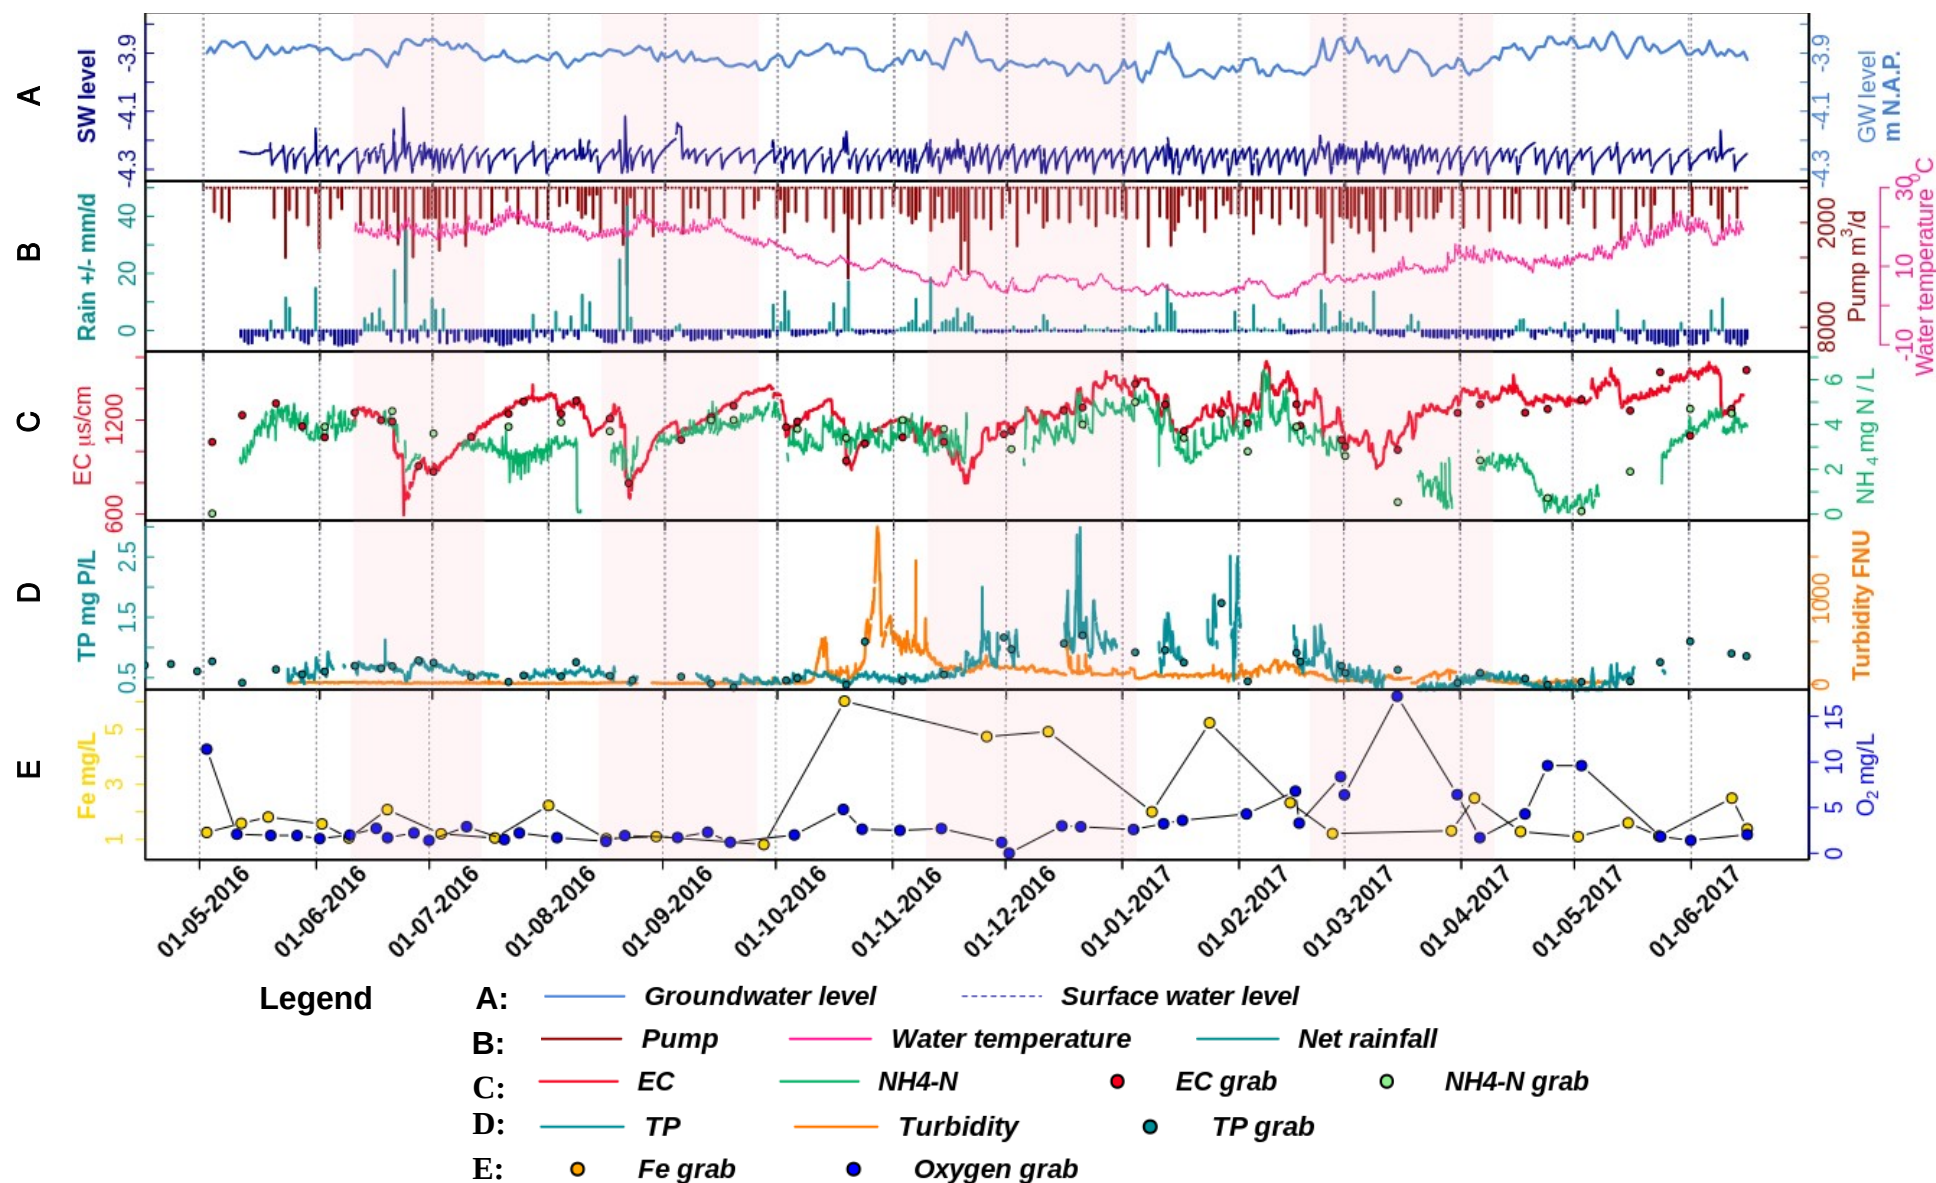

**Figure 2** Time series of (A) surface water level (SW level) and groundwater level (m NAP), (B) net rainfall (daily water surplus (+) (blue) and deficiency (-) (darkblue), mm d<sup>-1</sup>) and daily pumping volume (Pump m<sup>3</sup> d<sup>-1</sup>), (C) hourly time series of EC (μS/cm) and NH<sub>4</sub>-N (mg N L<sup>-1</sup>), and (D) hourly TP, turbidity, (E) discrete samples of Fe (total iron in water column) and O<sub>2</sub> concentrations (mg L<sup>-1</sup>). The dots in (C) and (D) are the corresponding discrete sampling data, which are plotted to show their close match to the continuous time series data, as well as to fill in the gaps. All data were monitored at the pump station. The transparent pink blocks are the selected rain events for further analysis in section 3.3.
