# Supplementary material for: Drivers of nitrogen and phosphorus dynamics in a groundwater-fed urban catchment revealed by high frequency monitoring
Source: Copernicus journal article supplement (doi:10.5194/hess-2020-34), 2020-02-26
Supplement: Supplementary file [file hess-2020-34-AC1-supplement.zip]

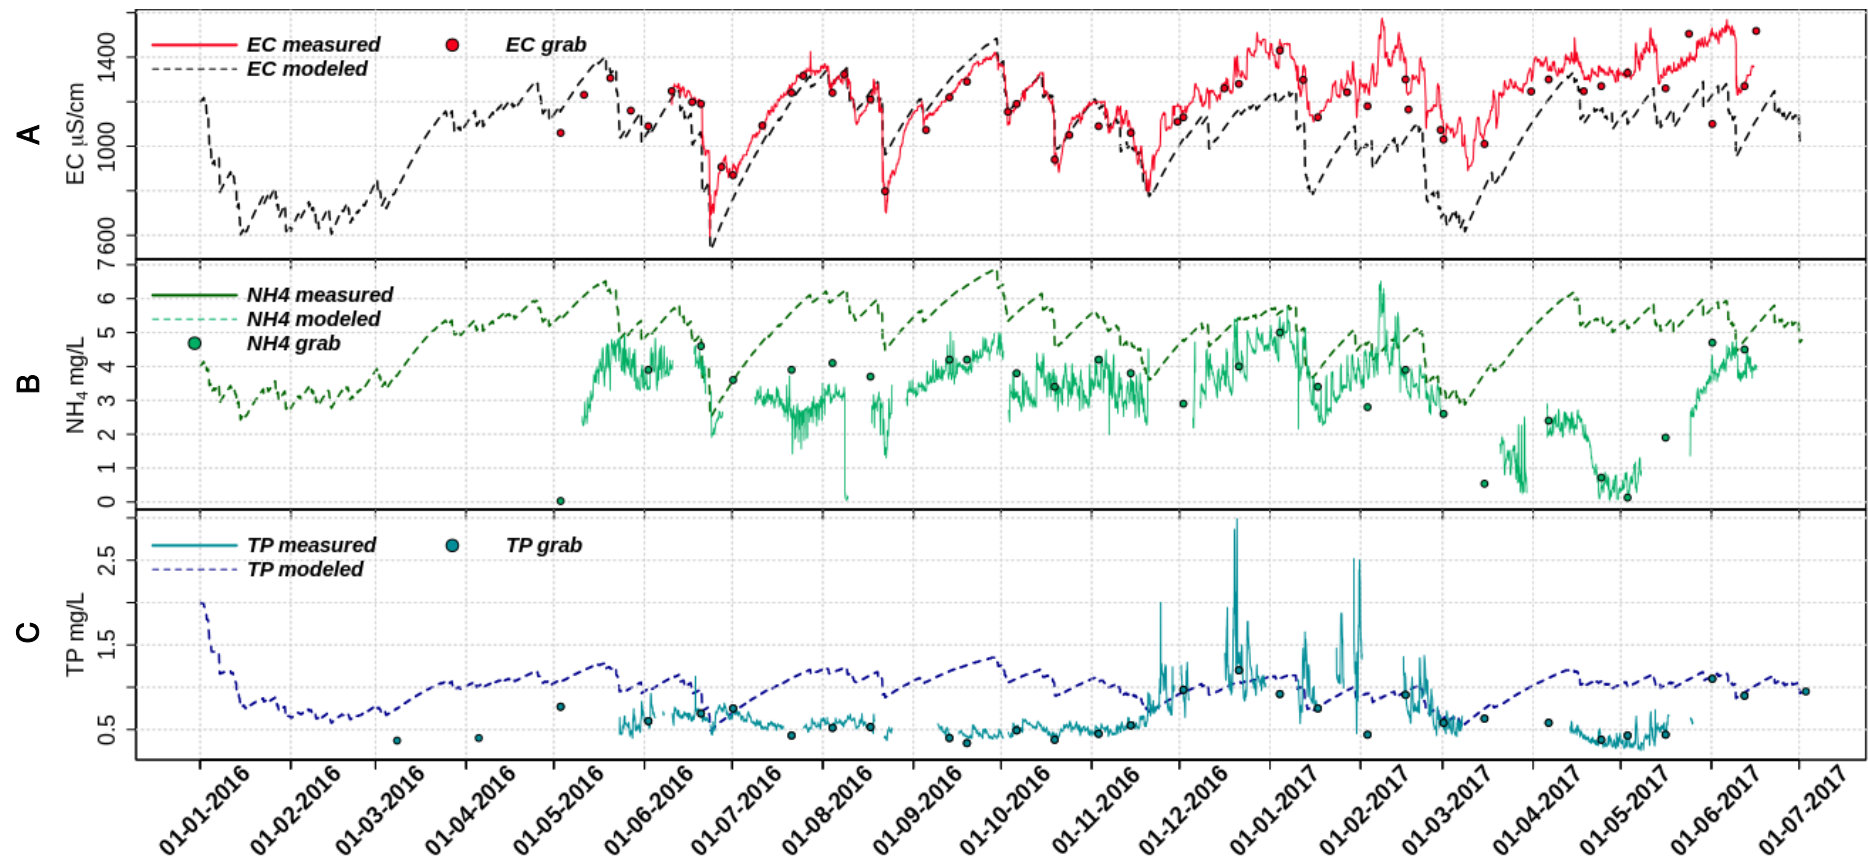

Figure 3 Plots of fixed-end-member mixing model predicted (A) EC, (B)  $\text{NH}_4$  and (C) TP with their measured time series data and the discrete sampling results.
