# Supplementary material for: Drivers of nitrogen and phosphorus dynamics in a groundwater-fed urban catchment revealed by high frequency monitoring
Source: Copernicus journal article supplement (doi:10.5194/hess-2020-34), 2020-02-26

Modelled versus measured water level

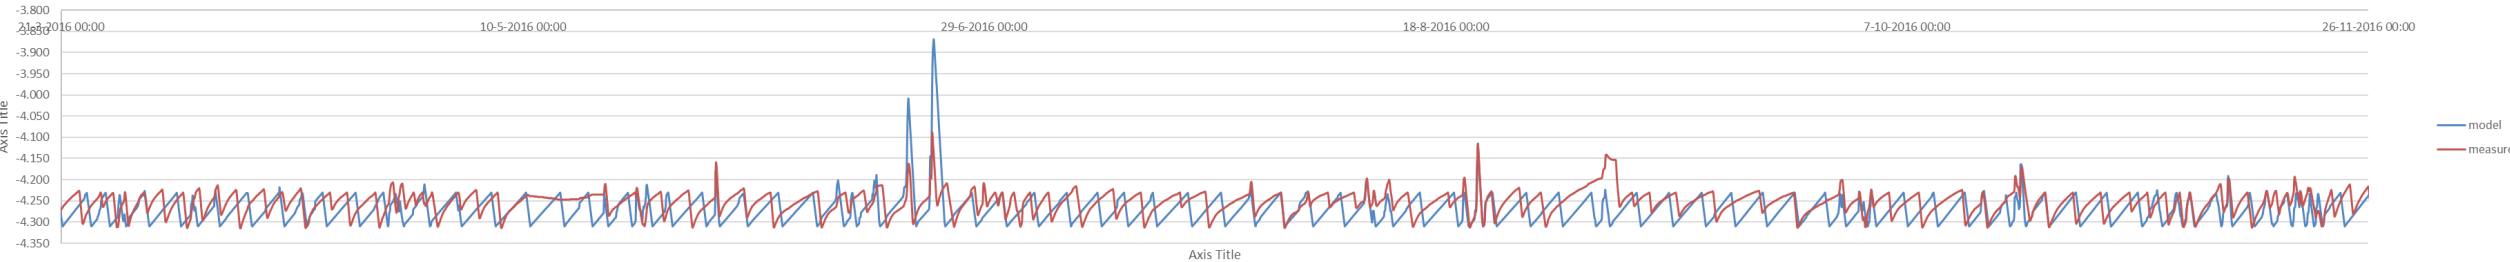

Supplement: Supplementary file [file hess-2020-34-AC4-supplement.zip]
