# Supplementary material for: Drivers of nitrogen and phosphorus dynamics in a groundwater-fed urban catchment revealed by high frequency monitoring
Source: Copernicus journal article supplement (doi:10.5194/hess-2020-34), 2020-02-26
Supplement: Supplementary file [file hess-2020-34-AC4-supplement.zip]

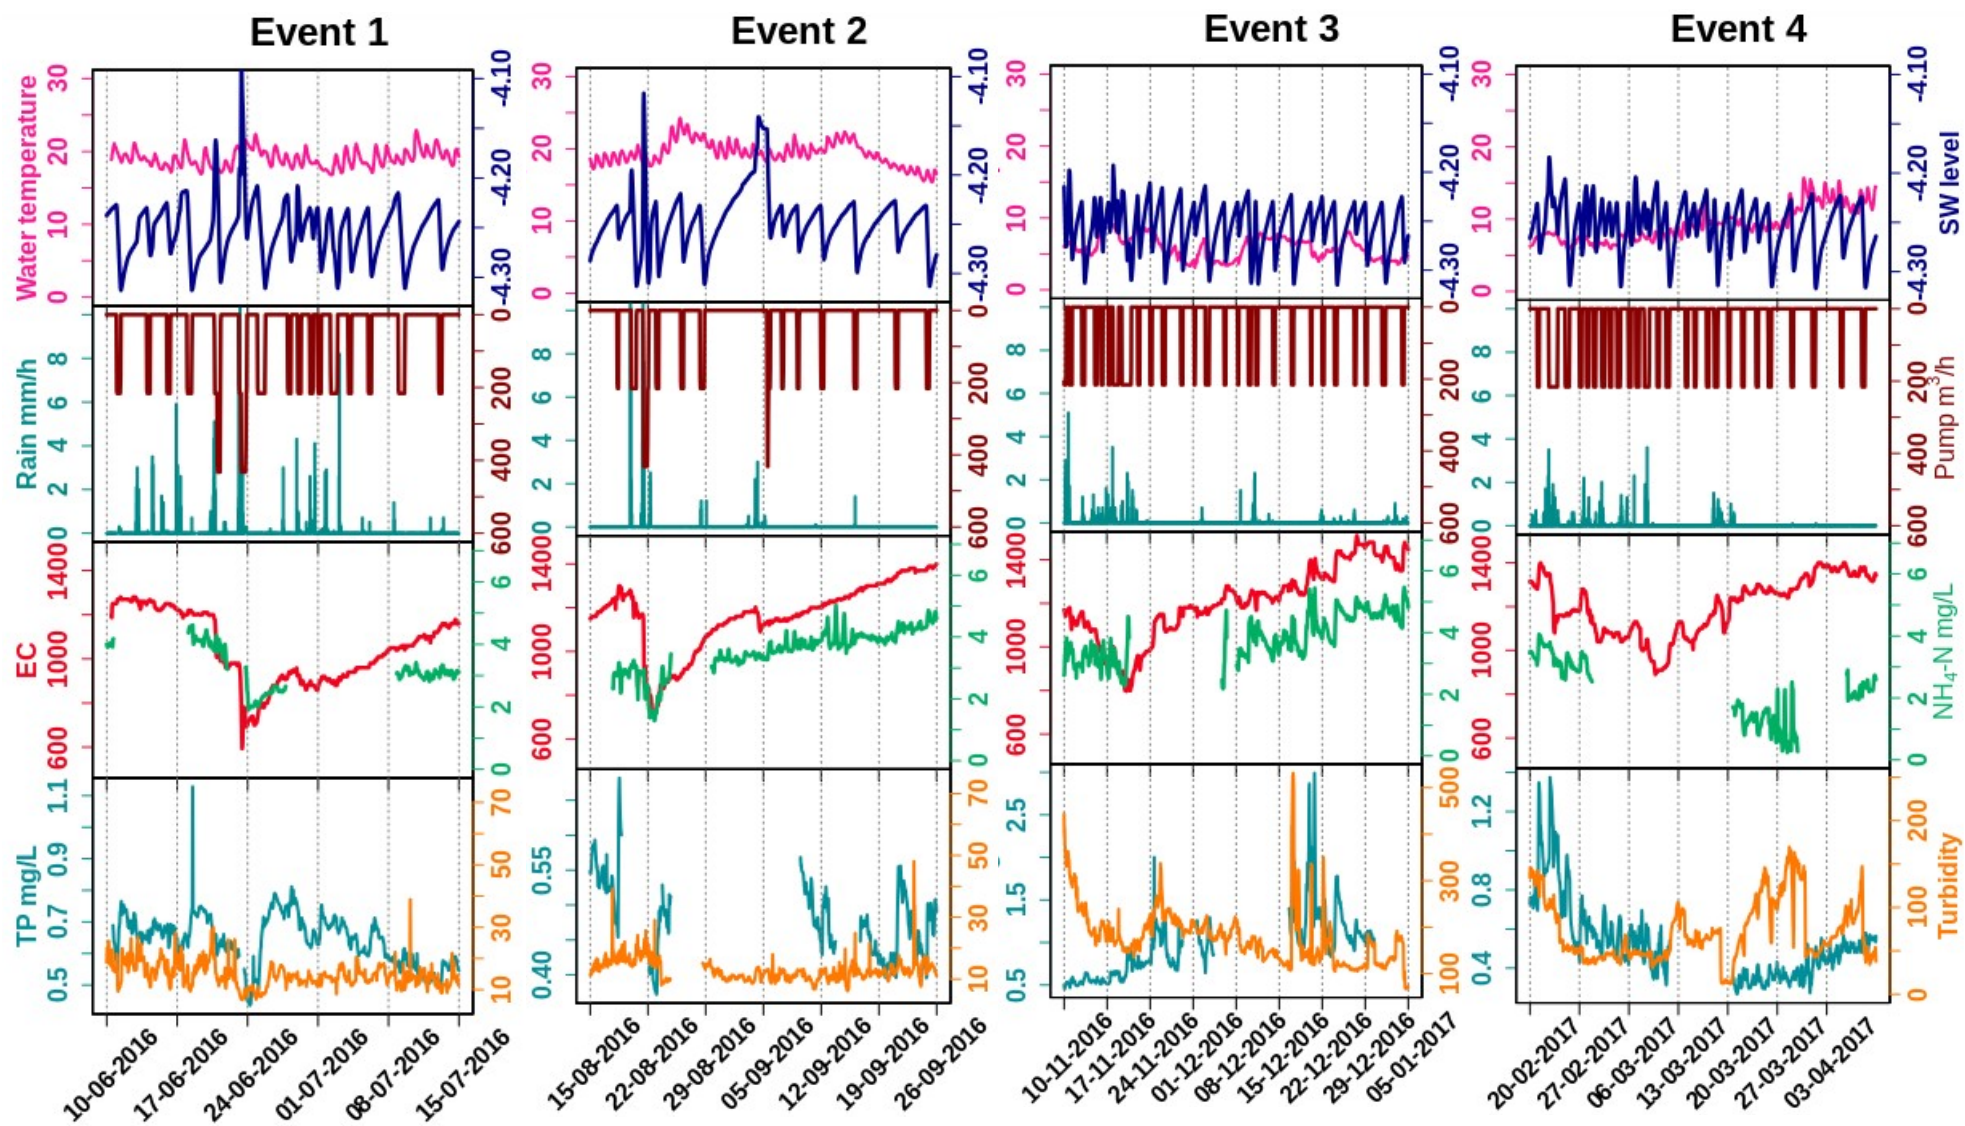

Figure 4 Selected events showing dilution and peaks of water quality parameters, with hourly precipitation (mm/h) and hourly pumping activity ( $\text{m}^3/\text{h}$ ). Note that between events different scales of TP and turbidity were used to reveal the dynamics.
